# Supplementary material for: A Mad7 System for Genetic Engineering of Filamentous Fungi
Source: MDPI journal article supplement (doi:10.3390/jof9010016), 2022-12-22
Supplement: s1 [file s1]

**Supplementary Table S1: List of primers**

| Primer ID                           | Description <sup>A</sup>                       | Sequence 5'→3'                                                                                  |
|-------------------------------------|------------------------------------------------|-------------------------------------------------------------------------------------------------|
| <b>Primers for Mad7 cloning</b>     |                                                |                                                                                                 |
| PR_DIV1462                          | ANPtef-F_PacI regen                            | GGGTTTAAUGCTGAGGGTTTAATTA<br>AGACCTCAGCCGAGACAGCAGAAT<br>CACCG                                  |
| PR_DIV0308                          | Ptef-RU                                        | ATGGTGAAGGUTGTGTTATGTTTTG                                                                       |
| PR_DIV1503                          | MAD7_ANIGopt-NLS_F                             | ACCTTCACCAUATGAACAACGGCAC<br>CAACAAC                                                            |
| PR_DIV1504                          | MAD7_ANIGopt-NLS_R                             | ATGTCCGCTCAGACCTTGCCTTCT<br>TCTT                                                                |
| PR_DIV0307                          | Ttef-FU                                        | AGCGGACAUTCGATTATGC                                                                             |
| PR_DIV0022                          | Ttef-mRFP-RU-PacI Dw                           | GGTCTTAAUGTATTGGGATGAATTT<br>GTATGC                                                             |
| <b>Primers for gRNAs</b>            |                                                |                                                                                                 |
| PR_DIV1507                          | Afum-P U3_F-PacI Up                            | GGGTTTAAUGATCACATAGATGCTC<br>GGTTGAC                                                            |
| PR_DIV1508                          | Afum-T U3_R-PacI Dw                            | GGTCTTAAUACCCTGAGAAGATAGA<br>TGTGAATG                                                           |
| PR_DIV1505                          | Afum-P U3_R-long                               | ACAAGAGUAGAAATTAATAAGGTC<br>TTTTGACTGCATCATCCGTGAATCGA<br>AC                                    |
|                                     | Afum-P U3_R-short                              | ACAAGAGUAGAAATTAATAAGGTC<br>TTTTGAC                                                             |
| PR_DIV1550                          | <i>A.niger</i> ATCC1015 PS_MAD7 <i>albA</i> -F | ATGCTTCCAUGCAATTGCATCATTGG<br>TCTAGTGGTAGAATTC                                                  |
| PR_DIV1551                          | <i>A.niger</i> ATCC1015 PS_MAD7 <i>albA</i> -R | ATGGAAGCAUTGCTGATCTACAAGA<br>GTAGAAATTAATAAGGTC                                                 |
| PR_DIV3119                          | <i>A. nidulans</i> yA gRNA2 Mad7               | ACTCTTGUAGAT<br>ATTGGCGGCGCTGCGCAAAAG<br>GCATCATTGGTCTAGTGGTAGAATTC                             |
| PR_DIV3073                          | <i>A.campestris</i> IBT28561 PS1_MAD7 Ku70-R   | ACTCGTTGATCUCAATGGATCTACA<br>AGAGTAGAAATTA                                                      |
| PR_DIV3074                          | <i>A.campestris</i> IBT28561 PS1_MAD7 Ku70-F   | AGATCAACGAGUCCGAGCATCATTGG<br>TCTAGTGGTA                                                        |
| PR_DIV3075                          | <i>A.campestris</i> IBT28561 PS2_MAD7 Ku70-R   | ATGAAGAGUCGCCGGGAGAATCTA<br>CAAGAGTAGAAATTA                                                     |
| PR_DIV3076                          | <i>A.campestris</i> IBT28561 PS2_MAD7 Ku70-F   | ACTCTTCAUCGGCATCATTGGTCTAG<br>TGGA                                                              |
| PR_DIV3086                          | <i>A.oryzae</i> RIB40 PS1_MAD7 Ku70-R          | ATCGCTGACUTCGATAGATCTACAA<br>GAGTAGAAATTAATAAGG                                                 |
| PR_DIV3087                          | <i>A.oryzae</i> RIB40 PS1_MAD7 Ku70-F          | AGTCAGCGAUTCGAGCATCATTGGT<br>CTAGTGG                                                            |
| PR_DIV3088                          | <i>A.oryzae</i> RIB40 PS2_MAD7 Ku70-R          | AAACATTAUCTGCATCTACAAGAGT<br>AGAAATTAATAAGG                                                     |
| PR_DIV3089                          | <i>A.oryzae</i> RIB40 PS2_MAD7 Ku70-F          | ATAATGTTUCTCTATCCGCATCATTG<br>GTCTAGTGG                                                         |
| <b>Primers for rescue templates</b> |                                                |                                                                                                 |
| PR_DIV3217                          | <i>albA</i> _gRNA1_RFP cassette-F              | TCGAAGCTGGCTGCGCCGTCTGCTC<br>CAAGCGAAGAATAGTACCATTGTCC<br>AGTCCTTTT<br>ATTCCCTTGATCTCTACACACAGG |
| PR_DIV3218                          | <i>albA</i> _gRNA1_RFP cassette-R              | ACGATGCTCGTGAAGCGTGGGAAGA<br>GCTTCCGATGAGACGGCGGGAGCTT                                          |

|                                   |                                |                                                                                                    |
|-----------------------------------|--------------------------------|----------------------------------------------------------------------------------------------------|
|                                   |                                | CGCGATCTCT<br>TCTTAATGCGATGCTTCCATTGCC                                                             |
| PR_DIV3219                        | yA_gRNA2_RFP cassette-F        | GTGTGCGAGCCCCGGTGATCTACGT<br>CGATCCCCGAATTCAACGGTTGGGTC<br>AGCCTTAATT<br>ATTCCCTTGTATCTCTACACACAGG |
| PR_DIV3220                        | yA_gRNA2_RFP cassette-R        | TCAACAAACTGTCCGTCAACTTCAT<br>ATACCCACATTGGGTGATTGTCGAC<br>AGAAAAAGTT<br>TCTTAATGCGATGCTTCCATTGCC   |
| PR_DIV3077                        | Ku70-Deletion cassette ACAM-F1 | GGGTTTAAUCCCTGTATATTTCCGAC<br>CTACG                                                                |
| PR_DIV3078                        | Ku70-Deletion cassette ACAM-R1 | AAACCCTUGGGCTCGATATCGGCAC<br>AGAAAACGGAGCAGAGCCTCTCG                                               |
| PR_DIV3079                        | Ku70-Deletion cassette ACAM-F2 | AAGGGTTUCGCCCTTCCCATCTCAA<br>GATGCGGCCTTACCTTATGATTGCT<br>ACATACC                                  |
| PR_DIV3080                        | Ku70-Deletion cassette ACAM-R2 | GGTCTTAAUCAAGATCAAGTGCTGC<br>GATATG                                                                |
| PR_DIV3091                        | Ku70-Deletion cassette AORY-F1 | GGGTTTAAUCTCCAATGTCCGCGTAT<br>TGC                                                                  |
| PR_DIV3092                        | Ku70-Deletion cassette AORY-R1 | AAACCCTUGGGCTCGATATCGGCAC<br>AGAAACATCTTTCACCTGTTTGTATC<br>CC                                      |
| PR_DIV3093                        | Ku70-Deletion cassette AORY-F2 | AAGGGTTUCGCCCTTCCCATCTCAA<br>GATGCGGCAAATGTGTACATGTTTCG<br>AGAT                                    |
| PR_DIV3094                        | Ku70-Deletion cassette AORY-R2 | GGTCTTAAUCACAATCGCTTTCCTCC<br>ATG                                                                  |
| PR_DIV3095                        | Ku70-Deletion cassette AORY-F3 | CTCCAATGTCCGCGTATTGC                                                                               |
| <b>Primers for diagnostic PCR</b> |                                |                                                                                                    |
| PR_DIV1555                        | MAD7_ANIG Opt_Seq1-F           | CTCCCGCTTCGCCACCTC                                                                                 |
| PR_DIV1556                        | MAD7_ANIG Opt_Seq1-R           | GAGGTGGCGAAGCGGGAG                                                                                 |
| PR_DIV1557                        | MAD7_ANIG Opt_Seq2-F           | CAACTACAACGGCTACAACCTC                                                                             |
| PR_DIV1558                        | MAD7_ANIG Opt_Seq2-R           | GAGGTTGTAGCCGTTGTAGTTG                                                                             |
| PR_DIV1559                        | MAD7_ANIG Opt_Seq3-F           | CTACGTCACCCAGAAGCCTTAC                                                                             |
| PR_DIV1560                        | MAD7_ANIG Opt_Seq3-R           | GTAAGGCTTCTGGGTGACGTAG                                                                             |
| PR_DIV1561                        | MAD7_ANIG Opt_Seq4-F           | CAACGACAACCTCCACACCA                                                                               |
| PR_DIV1562                        | MAD7_ANIG Opt_Seq4-R           | TGGTGTGGAGGTTGTCGTTG                                                                               |
| PR_DIV1563                        | MAD7_ANIG Opt_Seq5-F           | TCGCAAAGAGTGGAAGAGAT                                                                               |
| PR_DIV1564                        | MAD7_ANIG Opt_Seq5-R           | ATCTCTTCCACTCTTTGCGA                                                                               |
| PR_DIV1565                        | MAD7_ANIG Opt_Seq6-F           | GACACCATCGACATCACCAAG                                                                              |
| PR_DIV1566                        | MAD7_ANIG Opt_Seq6-R           | CTTGGTGATGTGCGATGGTGTC                                                                             |
| PR_DIV3221                        | int RFP-Seq-F                  | TACATGGCCAAGAAGCCCGTG                                                                              |
| PR_DIV3222                        | int RFP-Seq-R                  | CTTGAAGCGCATGAACTCC                                                                                |
| PR_DIV3223                        | ANPgpdA-Seq_F                  | CGAGCTTTCCTCACTTCATCG                                                                              |
| PR_DIV3224                        | ANtrpC-Seq-R                   | CTAAGCTATTCTTCTGCTTCGCC                                                                            |
| PR_DIV0420                        | albA1443_seq_F                 | CATGTGTATAAAGTGTGCGTCTCAT                                                                          |
| PR_DIV0421                        | albA1443_seq_R                 | GTGCAGCTCAGAACACCAGTG                                                                              |
| PR_DIV0418                        | yA1442_seq_F                   | CGTCCTCGAAGGAACACATCT                                                                              |
| PR_DIV0419                        | yA1442_seq_R                   | CTGATTGACATACGAGAGGATGG                                                                            |
| PR_DIV1746                        | ANPgpdA_seq1_R                 | CCTCATGGCGATTGCAGTC                                                                                |
| PR_DIV3081                        | ACAM ku70.deletion_Seq1-F      | CTGTTTCCGTAGCATTGTACTTCCT                                                                          |

|                                     |                               |                                                                                                                     |
|-------------------------------------|-------------------------------|---------------------------------------------------------------------------------------------------------------------|
| PR_DIV3082                          | ACAM ku70.deletion _Seq2-F    | GTCGTAGGAGTGATATGAGTAAATG<br>AA                                                                                     |
| PR_DIV3083                          | ACAM ku70.deletion _Seq1-R    | GGGAGTATTCGTACAGAGCAG                                                                                               |
| PR_DIV3084                          | ACAM ku70.deletion _Seq2-R    | AGTATACCTTGACACTCACGGT                                                                                              |
| PR_DIV3098                          | AORY ku70.deletion _Seq1-F    | CACAATCGCTTTCCTCCATG                                                                                                |
| PR_DIV3100                          | AORY ku70.deletion _Seq1-R    | CAATACCGCCCTCAACAAGG                                                                                                |
| PR_DIV3096                          | MAD7_AORY ku70_Seq1-F         | GGCGCACTTTCAGGATTGAG                                                                                                |
| PR_DIV3097                          | MAD7_AORY ku70_Seq2-F         | GACAGGCAGACACCTAGGAA                                                                                                |
| PR_DIV3099                          | MAD7_AORY ku70_Seq1-R         | GAGCATGCATTTCTGGGATTAG                                                                                              |
| <b>Primers for oligonucleotides</b> |                               |                                                                                                                     |
| PR_DIV3196                          | <i>albA</i> -gRNA1 oligo XbaI | CGTCTGCTCCAAGCGAAGAATAGTA<br>CCATTGTCCAGTCCT <sup>tctaga</sup> GAGATCG<br>CGAAGCTCCCGCCGTCTCATCGGAA<br>GCTCTTCCCACG |
| PR_DIV3197                          | yA-gRNA1 oligo XbaI           | GAGAGAGTTAGCAGAAATACAGTA<br>CGCAGAAGATAATCCTTAT <sup>tctaga</sup> CTT<br>CGGCGGAGTATCATAACATCGAGGT<br>TGAGTCTGGCTAT |

<sup>A</sup>Color code: Annealing sequence, **target sequence**, homologous recombination sequence, **PacI/Nt.BbvCI cassette**, Mad7 direct repeat, **custom USER overhangs**, **thymine-> uracil substitution**

**Supplementary Table S2:** List of plasmids

| Plasmid ID                                     | Description                                                                | Reference  |
|------------------------------------------------|----------------------------------------------------------------------------|------------|
| <b>Cloning vectors and PCR templates</b>       |                                                                            |            |
| P GeneArt™                                     | Mad7 codon optimized for <i>A. niger</i>                                   |            |
| pAC572                                         | pAMA1-pyrG-PacI/Nt.BbvCI                                                   | [14,30]    |
| pAC573                                         | pAMA1-argB-PacI/Nt.BbvCI                                                   | [14,30]    |
| pAC574                                         | pAMA1-hph-PacI/Nt.BbvCI                                                    | [14,30]    |
| pAC575                                         | pAMA1-ble-PacI/Nt.BbvCI                                                    | [14,30]    |
| pDIV296                                        | pAMA1-nat1-PacI/Nt.BbvCI                                                   | [43]       |
| pDIV297                                        | pAMA1-amdS-PacI/Nt.BbvCI                                                   | [43]       |
| pDIV309                                        | pAMA1-hph-MAD7-PAf_U3-AN_tRNA-MAD7 crRNA-PS-AN_tRNA-TAf_U3                 | [43]       |
| pDIV708                                        | <i>A. campestris ku70</i> deletion repair template – 2 kb homology regions | [43]       |
| pDIV710                                        | <i>A. oryzae ku70</i> deletion repair template – 1.4 kb homology regions   | [43]       |
| pAC1014                                        | <i>PgpdA-mRFP.TtrpC</i> repair template                                    |            |
| <b>pAMA1 with different markers and MAD7</b>   |                                                                            |            |
| pDIV298                                        | pAMA1-pyrG-Mad7-PacI/Nt.BbvCI                                              | [43]       |
| pDIV299                                        | pAMA1-argB-Mad7-PacI/Nt.BbvCI                                              | [43]       |
| pDIV300                                        | pAMA1-hph-Mad7-PacI/Nt.BbvCI                                               | [43]       |
| pDIV301                                        | pAMA1-ble-Mad7-PacI/Nt.BbvCI                                               | [43]       |
| pDIV302                                        | pAMA1-nat1-Mad7-PacI/Nt.BbvCI                                              | [43]       |
| pDIV303                                        | pAMA1-amdS-Mad7-PacI/Nt.BbvCI                                              | [43]       |
| <b>pAMA1-MAD7 vectors with gRNA constructs</b> |                                                                            |            |
| pDIV313                                        | pDIV313 pAMA1-hph-Mad7-PS <i>A. niger albA</i>                             | This study |
| pDIV707                                        | pDIV707 pAMA1-hyg-Mad7-2PS <i>A. campestris ku70</i>                       | This study |
| pDIV709                                        | pDIV709 pAMA1-pyrG-Mad7-2PS <i>A. oryzae ku70</i>                          | This study |
| pDIV711                                        | pDIV711 pAMA1-pyrG-Mad7-1PS <i>A. nidulans yA</i>                          | This study |



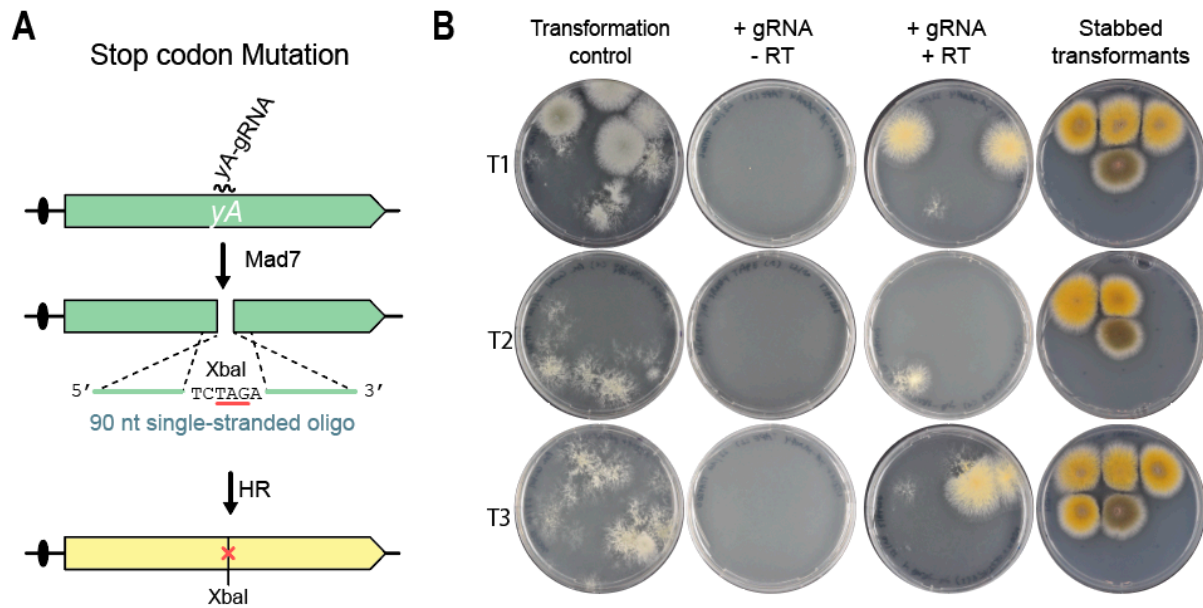

**Supplementary Figure S2:** Single-stranded oligonucleotide-mediated site specific mutagenesis in *A. nidulans*. A) Schematic representation of oligonucleotide mediated repair after Mad7 induced DNA double-strand-breaks in a given gene. B) Transformation results for all trials. Transformation control are protoplasts transformed with the empty Mad7-CRISPR plasmids pDIV298. Transformation results of *A. nidulans* protoplasts transformed with *yA*-Mad7 CRISPR vectors in the presence and absence of an oligonucleotide repair template as indicated. Stabs of independent transformants on a new plate are shown to the right with transformation control in the center of the plates

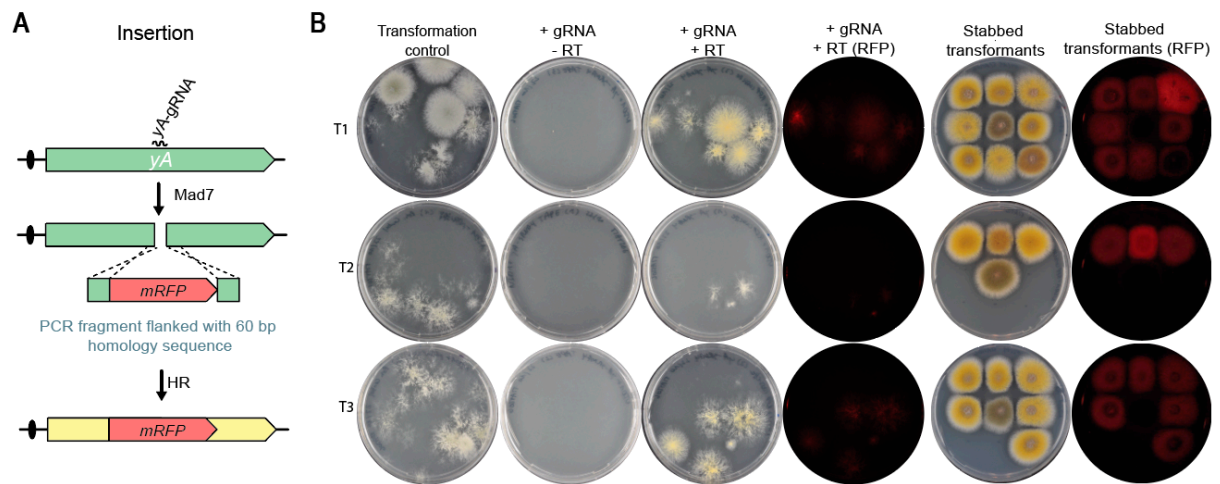

**Supplementary Figure S3: Mad7 induced gene insertion in *A. nidulans*.** A) Schematic representation of gene insertion experiments. Mad7 induces a DNA double-strand-break in the middle of a given gene. Subsequently, the DNA break is repaired by homologous recombination using a PCR fragment as repair template. In this case, the PCR fragment contains the RFP gene flanked by 60 bp of sequences identical to the two sides of the DNA break. B) Gene insertion in *yA* transformation results for all trials. Transformation control are protoplasts transformed with the empty Mad7-CRISPR plasmid pDIV298. Transformation results of *A. nidulans* protoplasts transformed with *yA*-Mad7 CRISPR vectors in the presence and absence of an RFP PCR fragment, which is used as repair template as indicated. Stabs of independent transformants on a new plate are shown to the right with the transformation control in the center of the plates

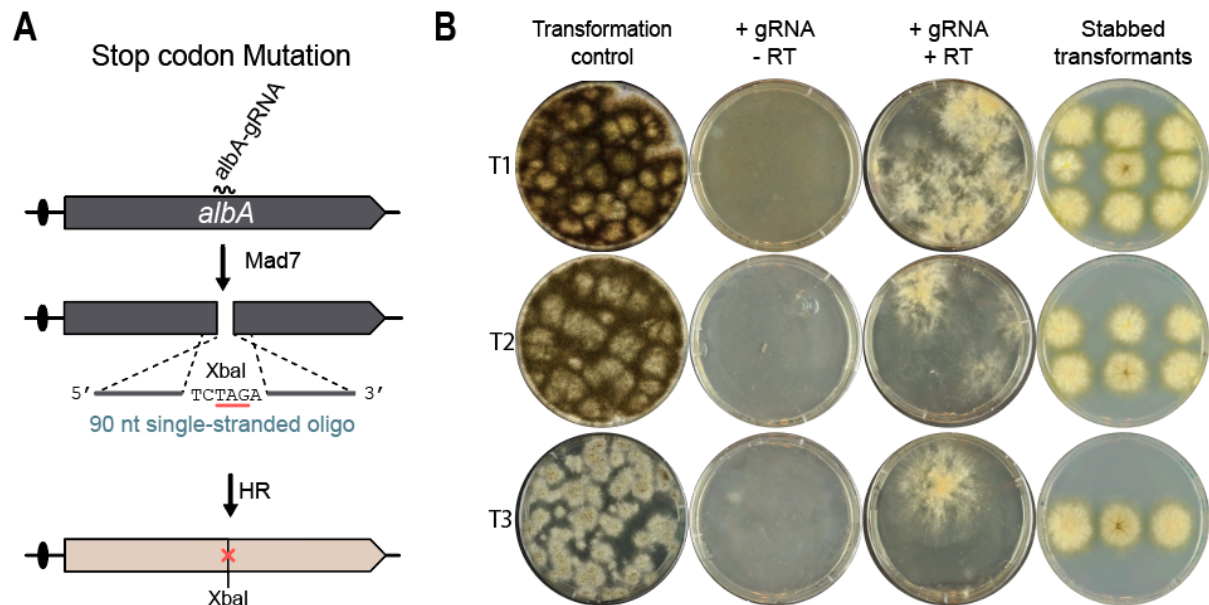

**Supplementary Figure S4:** Single-stranded oligonucleotide-mediated site specific mutagenesis in *A. niger*. A) Schematic representation of oligonucleotide mediated repair after Mad7 induced DNA double-strand-breaks in a given gene. B) Transformation results for all trials. Transformation control are protoplasts transformed with the empty Mad7-CRISPR plasmids pDIV300 for *A. niger*. Transformation results of *A. niger* protoplasts transformed with *albA*- Mad7 CRISPR vectors in the presence and absence of an oligonucleotide repair template as indicated. Stabs of independent transformants on a new plate are shown to the right with transformation control in the center of the plates



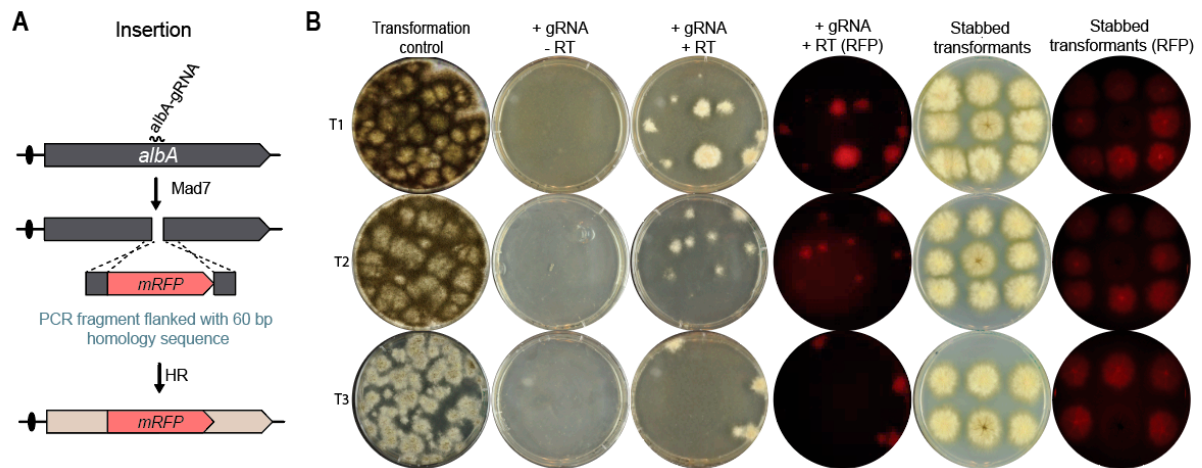

**Supplementary Figure S5: Mad7 induced gene insertion in *A. niger*.** A) Schematic representation of gene insertion experiments. Mad7 induces a DNA double-strand-break in the middle of a given gene. Subsequently, the DNA break is repaired by homologous recombination using a PCR fragment as repair template. In this case, the PCR fragment contains the RFP gene flanked by 60 bp of sequences identical to the two sides of the DNA break. B) Gene insertion of *albA* in *A. niger*. Transformation results for all trials. Transformation control are protoplasts transformed with the empty Mad7-CRISPR plasmids pDIV300. Transformation results of *A. niger* protoplasts transformed with *albA*-Mad7 CRISPR vectors in the presence and absence of an RFP PCR fragment, which is used as repair template as indicated. Stabs of independent transformants on a new plate are shown to the right with transformation control in the center of the plates
